# Supplementary material
Source: publisher figshare collection journal article supplement (https://gsajournals.figshare.com/ndownloader/files/29052303)
Supplement: Supplementary file 1 [file 29052303]

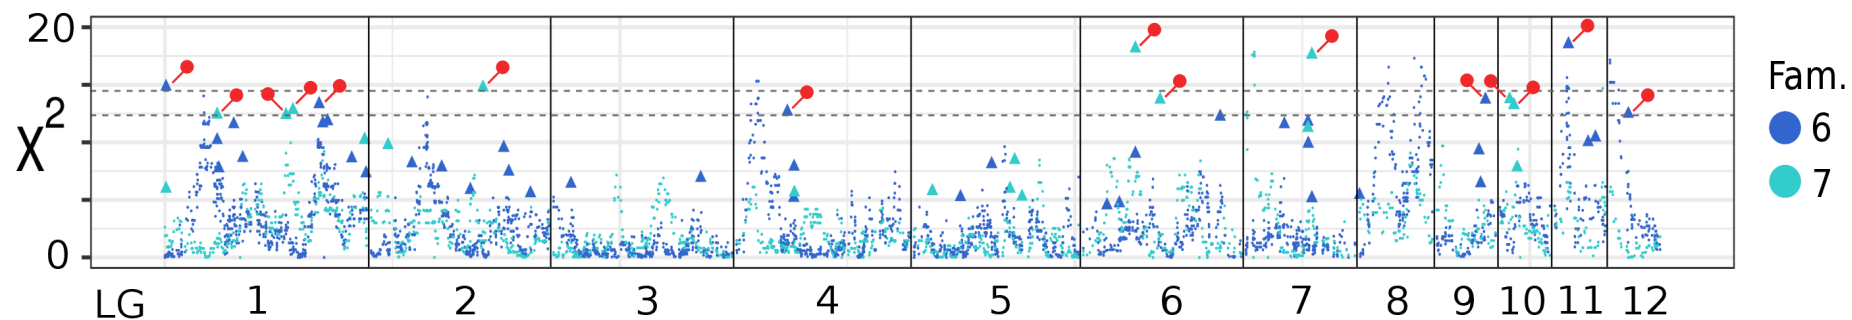

**Figure S7. Outlier loci with higher than expected  $\chi^2$  estimates in the map context.** The data and layout are the same as in Figure 5. Triangles indicate outlier estimates in at least one family that led to the removal of the associated locus before the reduced map was constructed. Twenty loci with  $\chi^2$  estimates greater than 20 are omitted from the plot and were removed as well. Red markers indicate  $\chi^2$  estimates outside spikes and above the lower (Bonferroni) significance threshold (lower dashed line).
